# Supplementary material for: Possible Implications of Bacteriospermia on the Sperm Quality, Oxidative Characteristics, and Seminal Cytokine Network in Normozoospermic Men
Source: MDPI journal article supplement (doi:10.3390/ijms23158678), 2022-08-04
Supplement: s1 [file ijms-1824460-supplementary.pdf › ijms-1824460-supplementary.pdf]

**Supplementary Table S1.** Resistance profiles of randomly selected bacterial isolates recovered from human semen.

| Bacterium              | Isolate |     |     |     |     | Bacterium             | Isolate |     |     |     |     |
|------------------------|---------|-----|-----|-----|-----|-----------------------|---------|-----|-----|-----|-----|
| <i>E. faecalis</i>     |         | LZD | AMP | TGC | IMP | <i>E. coli</i>        |         | TIC | TOB | C   | NOR |
|                        | 1       | S   | S   | S   | S   |                       | 1       | R   | S   | S   | S   |
|                        | 2       | S   | S   | S   | S   |                       | 2       | R   | S   | S   | S   |
|                        | 3       | S   | S   | S   | S   | <i>P. agglomerans</i> | 3       | S   | S   | S   | S   |
|                        | 4       | S   | S   | S   | S   |                       |         | TIC | TOB | CAZ | IMP |
|                        | 5       | S   | R   | S   | S   |                       | 1       | R   | S   | R   | S   |
|                        | 6       | S   | S   | S   | S   | <i>S. aureus</i>      | 2       | S   | S   | S   | S   |
|                        | 7       | S   | R   | S   | S   |                       | 3       | S   | S   | S   | S   |
|                        | 8       | S   | S   | S   | S   |                       |         | TOB | C   | TGC | TE  |
|                        | 9       | S   | R   | S   | S   |                       | 1       | S   | S   | S   | S   |
|                        | 10      | S   | R   | S   | R   |                       | 2       | R   | S   | S   | S   |
|                        | 11      | S   | S   | S   | S   |                       | 3       | S   | S   | S   | R   |
|                        | 12      | S   | S   | S   | S   |                       | 4       | R   | S   | S   | S   |
|                        | 13      | S   | S   | S   | S   |                       |         |     |     |     |     |
|                        | 14      | S   | R   | S   | R   |                       |         |     |     |     |     |
| <i>S. agalactiae</i>   |         | TE  | C   | LZD | VA  | <i>S. epidermidis</i> |         | TOB | C   | TGC | TE  |
|                        | 1       | S   | S   | S   | R   |                       | 1       | R   | S   | S   | R   |
|                        | 2       | R   | R   | S   | S   |                       | 2       | S   | S   | S   | R   |
|                        | 3       | S   | S   | S   | S   |                       | 3       | S   | S   | S   | R   |
|                        | 4       | S   | S   | S   | S   |                       | 4       | R   | S   | S   | R   |
|                        | 5       | R   | R   | S   | S   |                       | 5       | S   | S   | S   | R   |
| <i>S. haemolyticus</i> | 6       | S   | S   | S   | S   |                       | 6       | R   | S   | S   | I   |
|                        |         | TOB | C   | TGC | TE  |                       | 7       | R   | S   | S   | R   |
|                        | 1       | R   | S   | S   | R   |                       | 8       | R   | S   | S   | S   |
|                        | 2       | R   | S   | S   | R   |                       | 9       | R   | S   | S   | S   |
|                        | 3       | R   | S   | S   | R   |                       | 10      | S   | S   | S   | R   |
|                        | 4       | S   | S   | S   | R   |                       | 11      | R   | S   | S   | R   |
|                        | 5       | R   | S   | S   | R   |                       | 12      | S   | S   | S   | R   |
|                        | 6       | R   | S   | S   | R   |                       | 13      | S   | S   | S   | R   |
|                        | 7       | R   | S   | S   | R   |                       | 14      | R   | S   | S   | S   |
|                        | 8       | R   | S   | S   | R   |                       | 15      | R   | S   | S   | S   |
|                        | 9       | S   | S   | S   | R   |                       | 16      | R   | S   | S   | S   |
|                        | 10      | R   | S   | S   | S   |                       | 17      | R   | S   | S   | R   |
|                        | 11      | R   | S   | S   | R   |                       | 18      | S   | S   | S   | R   |
|                        | 12      | S   | S   | S   | R   |                       | 19      | S   | S   | S   | R   |
|                        | 13      | S   | S   | S   | R   | <i>S. hominis</i>     |         | TOB | C   | TGC | TE  |
|                        | 14      | R   | S   | S   | I   |                       | 1       | S   | S   | S   | R   |
|                        | 15      | R   | S   | S   | R   |                       | 2       | R   | S   | S   | R   |
|                        | 16      | R   | S   | S   | S   |                       | 3       | R   | S   | S   | R   |
|                        | 17      | S   | S   | S   | I   |                       | 4       | R   | S   | S   | I   |
|                        | 18      | R   | S   | S   | R   |                       | 5       | S   | S   | S   | R   |
|                        | 19      | R   | S   | S   | R   |                       | 6       | R   | S   | S   | R   |
|                        | 20      | R   | S   | S   | S   |                       | 7       | R   | S   | S   | I   |
| <i>S. capitis</i>      |         | TOB | C   | TGC | TE  |                       | 8       | R   | S   | S   | R   |
|                        | 1       | S   | S   | S   | R   |                       | 9       | S   | S   | S   | R   |
|                        | 2       | S   | S   | S   | R   |                       | 10      | S   | S   | S   | R   |
|                        | 3       | S   | S   | S   | S   |                       | 11      | R   | S   | S   | I   |
|                        | 4       | S   | S   | S   | S   |                       | 12      | S   | S   | S   | R   |

|    |   |   |   |   |                 |     |     |     |     |
|----|---|---|---|---|-----------------|-----|-----|-----|-----|
| 5  | S | S | S | R | 13              | S   | S   | S   | R   |
| 6  | R | S | S | I | 14              | S   | S   | S   | R   |
| 7  | S | S | S | R | 15              | R   | S   | S   | S   |
| 8  | S | S | S | R | 16              | R   | S   | S   | S   |
| 9  | S | S | S | R | 17              | R   | S   | S   | S   |
| 10 | R | S | S | I | 18              | R   | S   | S   | R   |
| 11 | R | S | S | I | 19              | R   | S   | S   | R   |
| 12 | S | S | S | R | 20              | S   | S   | S   | R   |
| 13 | S | S | S | R | 21              | R   | S   | S   | R   |
| 14 | R | S | S | I | 22              | R   | S   | S   | R   |
| 15 | S | S | S | S | 23              | R   | S   | S   | R   |
| 16 | S | S | S | S | 24              | R   | S   | S   | I   |
| 17 | S | S | S | R | 25              | R   | S   | S   | R   |
| 18 | R | S | S | I | 26              | R   | S   | S   | R   |
| 19 | R | S | S | I | 27              | R   | S   | S   | R   |
| 20 | S | S | S | R | 28              | S   | S   | S   | R   |
| 21 | S | S | S | R | 29              | S   | S   | S   | R   |
| 22 | S | S | S | R | 30              | R   | S   | S   | S   |
| 23 | S | S | S | R | 31              | R   | S   | S   | S   |
| 24 | R | S | S | I | 32              | R   | S   | S   | S   |
| 25 | R | S | S | I | 33              | R   | S   | S   | S   |
| 26 | S | S | S | S | 34              | R   | S   | S   | S   |
| 27 | S | S | S | S | 35              | S   | S   | S   | R   |
| 28 | S | S | S | R | 36              | R   | S   | S   | R   |
| 29 | S | S | S | R | 37              | R   | S   | S   | I   |
| 30 | R | S | S | I |                 | TIC | TOB | CAZ | IMP |
| 31 | R | S | S | I | <i>P. fulva</i> | 1   | S   | S   | S   |
